# Supplementary material
Source: Research Square preprint supplement (doi:10.21203/rs.3.rs-8732344/v1)
Supplement: Supplementary file 1 [file f262dd31cf325d50acbe06b0.pdf]

## Attachment 1

### Informed Consent Form

#### Consent for Participation in Survey

1. Principal Investigator: Dr. Bhavani Rao R.
2. Co-Investigator: Rondine Twist.
3. You are invited to participate in research conducted by Rondine Twist and Amala Sebastian from Amrita Vishwa Vidyapeetham.
4. Our research will be in English, and we would like to understand your point of view about the Gender based connectedness with nature among Indian university students.
5. We would like to understand your point of view and understand whether other factors impact the difference in connectedness with nature (CONNECTEDNESS WITH NATURE) scores between women and men.
6. You understand that:
  - i. Your participation in this research is voluntary. It is ok if you want to stop at any point. It is fully up to you.
  - ii. You may withdraw and discontinue participation at any time.
  - iii. You will not be paid for your participation, but your participation will be very helpful to us, and to the larger scholarly community.
  - iv. Some questions might feel uncomfortable, but not beyond what you experience on a day-to-day basis. If questions feel uncomfortable, you can skip them.
  - v. Everything you say will be confidential - it means that no one will know what you have said except the research teams. Your name will not appear anywhere.
7. Participation involves attending the survey prepared by researchers from Amrita Vishwa Vidyapeetham.
8. From what we learn from many people, we hope to publish the information in an academic journal to help others understand what you have collectively taught us.

You have read and/or understand the explanation provided to you. You have had all your questions answered to your satisfaction, and you voluntarily agree to participate in this study.

I agree to have my interview audio recorded. \_\_\_\_\_

I agree to participate in the study. \_\_\_\_\_

Date \_\_\_\_\_

Investigator Signature \_\_\_\_\_

For further information, or questions about this research study please contact:

Rondine Twist at 7592 028780 or Amala Sebastian at 9895762143.

[Rondine\\_c\\_twist@msn.com](mailto:Rondine_c_twist@msn.com)

[Amalasebastian180@gmail.com](mailto:Amalasebastian180@gmail.com).
